# Supplementary material for: Bayesian analysis of isothermal titration calorimetry for binding thermodynamics
Source: PLOS journal article supplement (doi:10.1371/journal.pone.0203224), 2018-09-13

# Bayesian approach

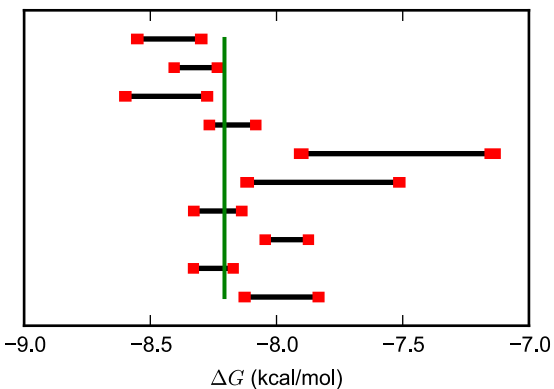

# Nonlinear least squares

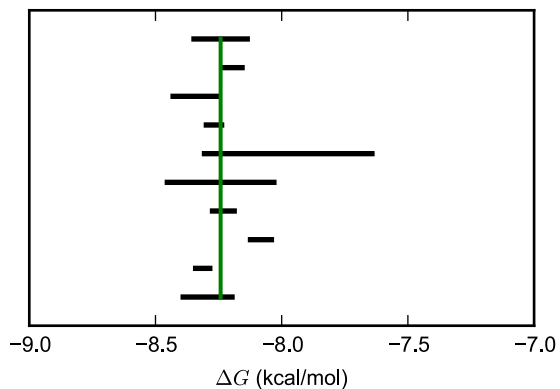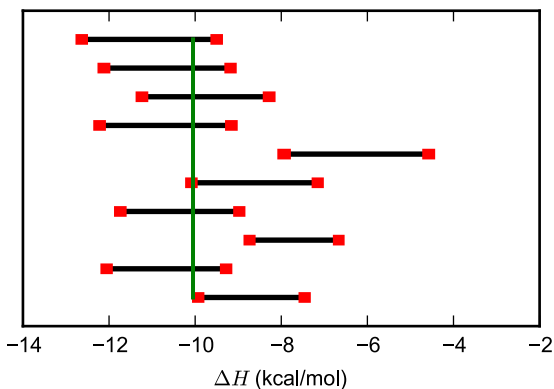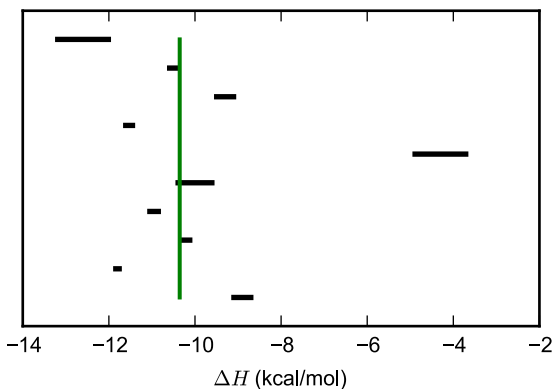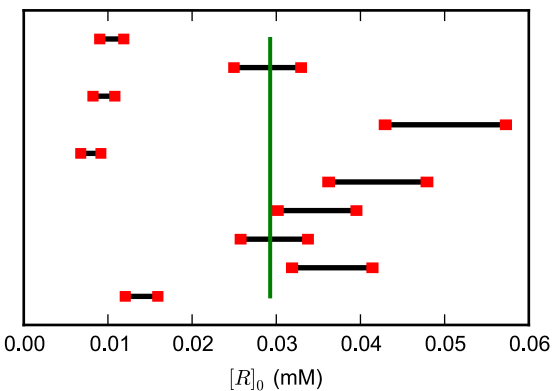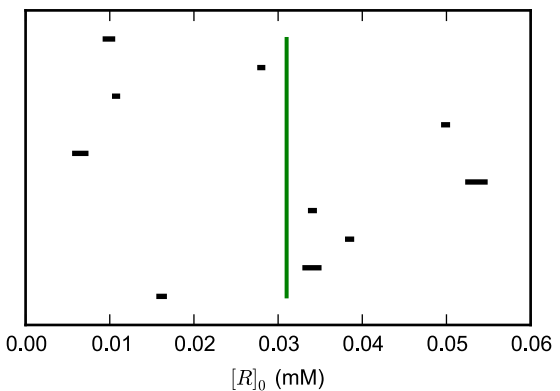

Supplement: S19 (10.1371/journal.pone.0203224.s019) [file journal.pone.0203224.s019]
